# Supplementary material for: The Saskatchewan/New Brunswick Healthy Start-Départ Santé intervention: implementation cost estimates of a physical activity and healthy eating intervention in early learning centers
Source: PubMed Central journal article supplement (PMC5247800; doi:10.1186/s12913-017-1978-9), 2017-01-19
Supplement: 12913_2017_1978_MOESM1_ESM.pdf [file 12913_2017_1978_MOESM1_ESM.pdf]

## **Additional file 1**

### **The Saskatchewan/New Brunswick Healthy Start-Départ Santé Intervention: Implementation cost estimates of a physical activity and healthy eating intervention in early learning centers<sup>1</sup>**

*Nazmi Sari\**

*Department of Economics, University of Saskatchewan*

*Nazeem Muhajarine*

*Community Health & Epidemiology and Saskatchewan Population Health and Evaluation  
Research Unit, University of Saskatchewan*

*Amanda Froehlich Chow*

*College of Kinesiology, University of Saskatchewan*

---

<sup>1</sup> This project was funded by the Public Health Agency of Canada (PHAC). During the course of the project we have received assistance from the HS-DS managerial staff from Saskatchewan and New Brunswick. We thank the PHAC for financial support, and the HS-DS for their assistance. While data set for this work, in part, was provided by the HS-DS, the analysis and conclusions drawn are the responsibility of the authors.

\* Correspondence: Nazmi Sari, Department of Economics, University of Saskatchewan, Arts 815, 9 Campus Drive, Saskatoon, SK, Canada S7N 5A5; E-mail: Nazmi.Sari@usask.ca; [homepage.usask.ca/~sari/](http://homepage.usask.ca/~sari/)

Table S1: Training sessions by year and community size (large, medium, small and rural) in Saskatchewan

|                                        | 2013-2014 |        |       |       | 2014-2015 |        |       |       | 2015-2016 |        |       |       |
|----------------------------------------|-----------|--------|-------|-------|-----------|--------|-------|-------|-----------|--------|-------|-------|
|                                        | Large     | Medium | Small | Rural | Large     | Medium | Small | Rural | Large     | Medium | Small | Rural |
| Total # of sessions                    | 15        | 4      | 9     | 5     | 5         | 3      | 8     | 4     | 11        | 1      | 8     | 7     |
| Total # of hours                       | 45        | 11     | 27    | 15    | 21        | 11     | 32    | 14    | 44        | 3      | 38    | 31    |
| Total # of educators trained           | 109       | 40     | 73    | 22    | 64        | 42     | 59    | 13    | 153       | 5      | 79    | 50    |
| Total # of directors trained           | 15        | 4      | 9     | 5     | 5         | 3      | 8     | 4     | 11        | 1      | 8     | 7     |
| Total # of others trained              | 14        | 7      | 20    | 5     | 8         | 6      | 9     | 1     | 10        | 1      | 23    | 4     |
| Total # of trainers                    |           |        |       |       | 6         | 5      | 9     | 5     | 15        | 2      | 11    | 10    |
| Total # of hours travelled by trainers | 0         | 11.2   | 37.1  | 15    | 5         | 11.8   | 24    | 28.3  | 9.9       | 4.8    | 44.8  | 17.1  |
| Total # of overnight stays by trainers | 0         | 0      | 0     | 0     | 1         | 2      | 3     | 2     | 1         | 0      | 4     | 3     |

Note: Large communities have a population of 100 000 or more, medium communities have a population between 30, 000 and 99, 999, small communities have a population of between 1000 to 29, 999 and rural communities have a population of under 999.

Table S2 Training sessions by year and community size (large, medium, small and rural) in New Brunswick

|                                        | 2013-2014 |        |       |       | 2014-2015 |        |       |       |
|----------------------------------------|-----------|--------|-------|-------|-----------|--------|-------|-------|
|                                        | Large     | Medium | Small | Rural | Large     | Medium | Small | Rural |
| Total # of sessions                    | 1         | 2      | 5     | 0     | 1         | 5      | 8     | 2     |
| Total # of hours                       | 3         | 6      | 15    | 0     | 3         | 15     | 24    | 6     |
| Total # of educators trained           | 6         | 11     | 32    | 0     | 1         | 16     | 19    | 5     |
| Total # of directors trained           | 1         | 2      | 5     | 0     | 1         | 5      | 8     | 2     |
| Total # of trainers                    | 2         | 4      | 10    | 0     | 2         | 10     | 16    | 4     |
| Total # of hours travelled by trainers | 0         | 6.1    | 19.6  | 0     | 0         | 20     | 33    | 6.3   |
| Total # of overnight stays by trainers | 0         | 2      | 4     | 0     | 0         | 2      | 7     | 2     |

Note: Large communities have a population of 100 000 or more, medium communities have a population between 30, 000 and 99, 999, small communities have a population of between 1000 to 29, 999 and rural communities have a population of under 999.

Table S3: Booster Sessions by year and community size (large, medium, small and rural) in Saskatchewan

|                                        | 2013-2014 |        |       |       | 2014-2015 |        |       |       | 2015-2016 |        |       |        |
|----------------------------------------|-----------|--------|-------|-------|-----------|--------|-------|-------|-----------|--------|-------|--------|
|                                        | Large     | Medium | Small | Rural | Large     | Medium | Small | Rural | Large     | Medium | Small | Rural  |
| Total # of sessions                    | 5         | 1      | 5     | 1     | 7         | 5      | 9     | 4     | 7         | 0      | 10    | 18     |
| Total # of hours                       | 2.75      | 1      | 6.75  | 1.5   | 8.25      | 6      | 12    | 5     | 9.42      | 0      | 14.08 | 31     |
| Total # of educators trained           | 41        | 6      | 35    | 7     | 37        | 20     | 47    | 10    | 41        | 0      | 29    | 42     |
| Total # of directors trained           | 5         | 1      | 5     | 1     | 6         | 5      | 8     | 4     | 7         | 0      | 9     | 15     |
| Total # of others trained              | 3         | 1      | 5     | 1     | 1         | 2      | 5     | 1     | 4         | 0      | 6     | 7      |
| Total # of trainers                    | 5         | 1      | 5     | 1     | 8         | 5      | 9     | 6     | 7         | 0      | 10    | 18     |
| Total # of hours travelled by trainers | .83       | 1.73   | 11.27 | 1.73  | 15        | 22     | 49.37 | 38.9  | 0         | 0      | 50.87 | 110.33 |
| Total # of overnight stays by trainers | 0         | 0      | 0     | 0     | 1         | 2      | 1     | 1     | 0         | 0      | 3     | 6      |

Note: Large communities have a population of 100 000 or more, medium communities have a population between 30, 000 and 99, 999, small communities have a population of between 1000 to 29, 999 and rural communities have a population of under 999.

Table S4 Booster Sessions by year and community size (large, medium, small and rural) in New Brunswick

|                                        | 2013-2014 |        |       |       | 2014-2015 |        |       |       |
|----------------------------------------|-----------|--------|-------|-------|-----------|--------|-------|-------|
|                                        | Large     | Medium | Small | Rural | Large     | Medium | Small | Rural |
| Total # of sessions                    | 0         | 1      | 4     | 0     | 0         | 2      | 5     | 0     |
| Total # of hours                       | 0         | 1      | 4     | 0     | 0         | 2      | 5     | 0     |
| Total # of educators trained           | 0         |        |       | 0     | 0         |        |       | 0     |
| Total # of directors trained           | 0         | 1      | 4     | 0     | 0         | 2      | 5     | 0     |
| Total # of trainers                    | 0         | 1      | 4     | 0     | 0         | 2      | 5     | 0     |
| Total # of hours travelled by trainers | 0         | 3.07   | 16.53 | 0     | 0         | 6.6    | 13.7  | 0     |
| Total # of overnight stays by trainers | 0         | 1      | 3     | 0     | 0         | 2      | 4     | 0     |

Note: Large communities have a population of 100 000 or more, medium communities have a population between 30, 000 and 99, 999, small communities have a population of between 1000 to 29, 999 and rural communities have a population of under 999.
